# Supplementary material for: A subset of RAB proteins modulates PP2A phosphatase activity
Source: PubMed Central journal article supplement (PMC5017145; doi:10.1038/srep32857), 2016-09-09

## A subset of RAB proteins modulates PP2A phosphatase activity

Francesca Sacco<sup>1\*</sup>, Anna Mattioni<sup>1</sup>, Karsten Boldt<sup>2</sup>, Simona Panni<sup>3</sup>, Elena Santonico<sup>1</sup>, Luisa Castagnoli<sup>1</sup>, Marius Ueffing<sup>2, 4</sup>, Gianni Cesareni<sup>1\*</sup>

### Supplementary Figures

Figure S1. Full-blots of Fig.2

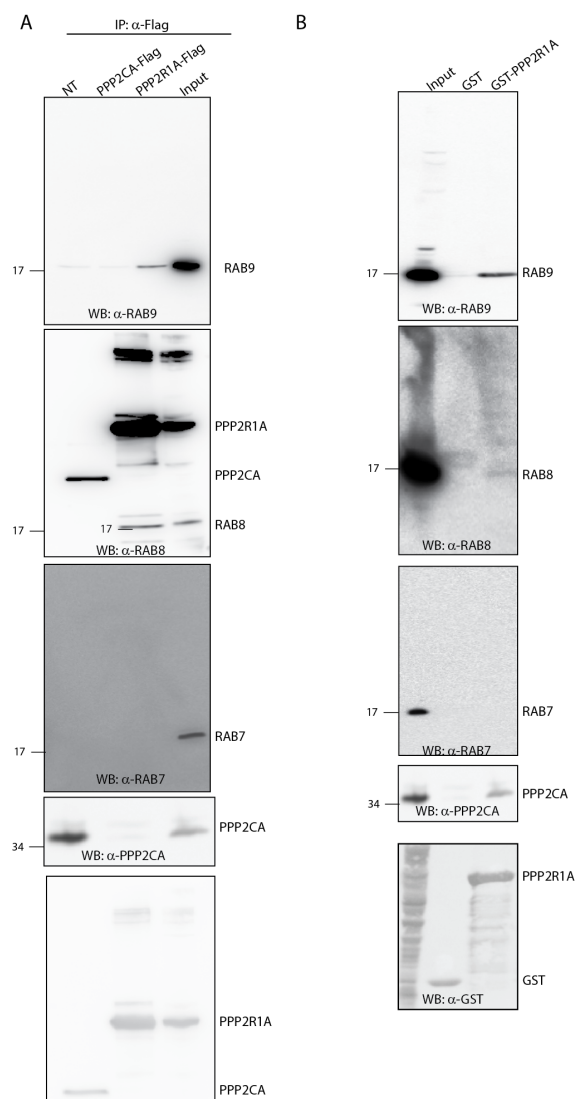

**Figure S2. Full-blots of Fig.5**

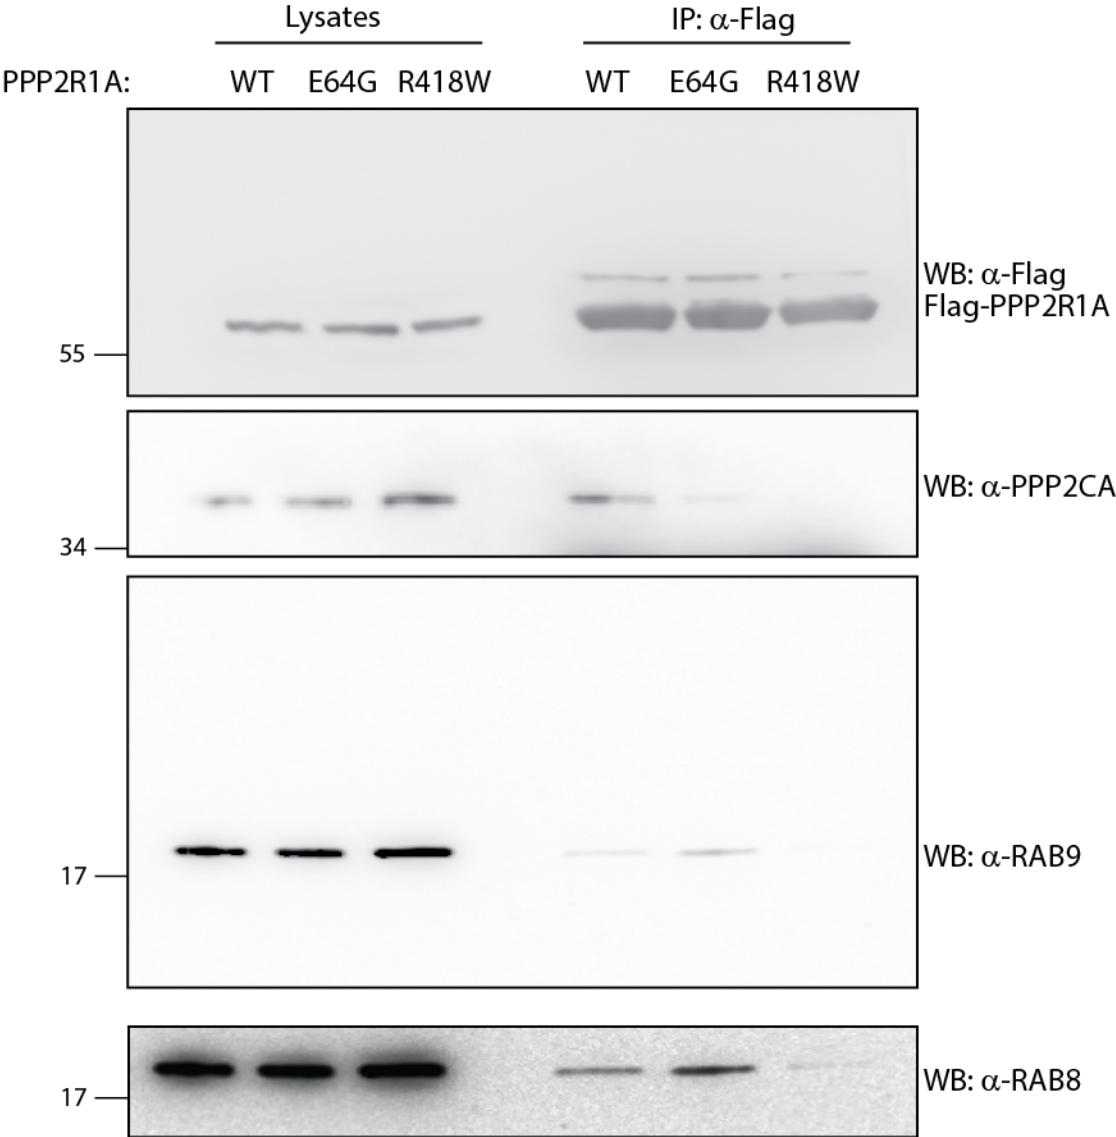



**Figure S4. Full-blots of Fig.7B**

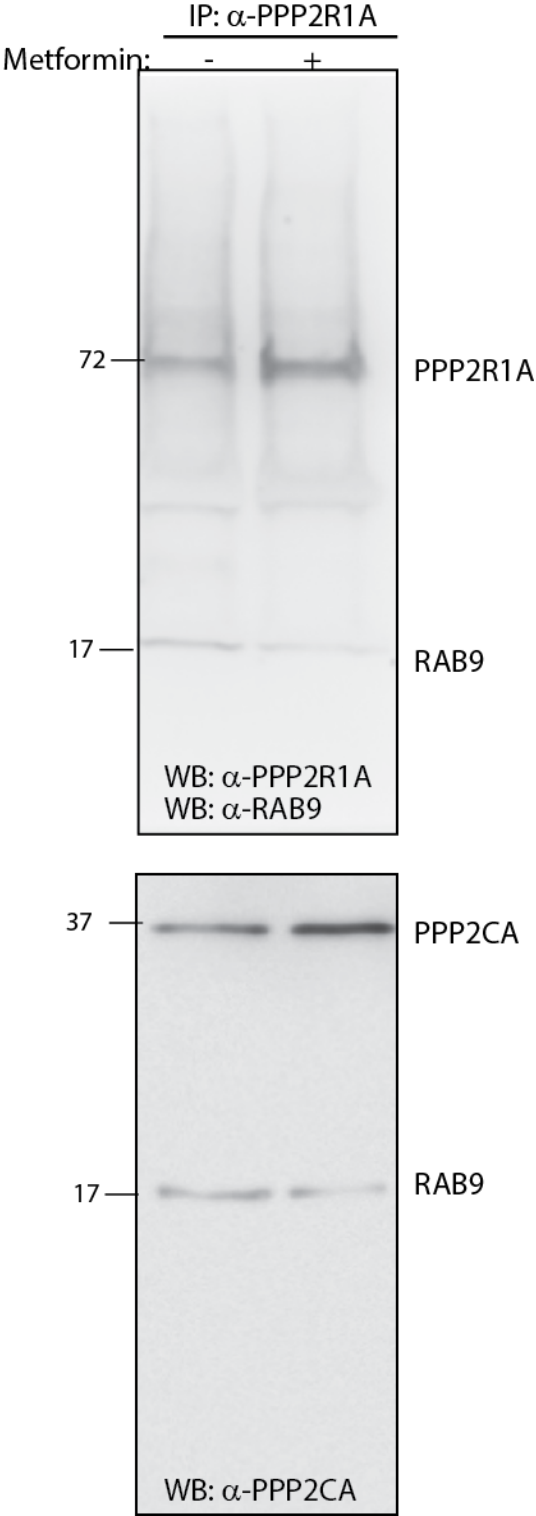

Supplement: srep32857-s1.pdf [file srep32857-s1.pdf]
